# Supplementary material for: Guided Metabolic Detoxification Program Supports Phase II Detoxification Enzymes and Antioxidant Balance in Healthy Participants
Source: MDPI journal article supplement (doi:10.3390/nu15092209), 2023-05-06
Supplement: s1 [file s1]

**Supplementary Table S1.** Metabolic, lipid, and inflammatory panels data ( $\pm$  SEM).

|                                 | Reference range | Control             |                     |      | Detox               |                    |      |
|---------------------------------|-----------------|---------------------|---------------------|------|---------------------|--------------------|------|
|                                 |                 | Baseline            | End of study        | P    | Baseline            | End of study       | P    |
| Alanine aminotransferase, U/L   | 4-36            | 24.33 $\pm$ 3.83    | 17.44 $\pm$ 1.76    | 0.11 | 16.14 $\pm$ 1.14    | 17.64 $\pm$ 1.63   | 0.46 |
| Alkaline phosphatase, U/L       | 44-147          | 67.67 $\pm$ 5.50    | 64.89 $\pm$ 5.15    | 0.71 | 62.78 $\pm$ 4.26    | 61.86 $\pm$ 4.98   | 0.89 |
| Aspartate aminotransferase, U/L | 8-33            | 21.11 $\pm$ 1.59    | 18.11 $\pm$ 0.95    | 0.11 | 19.14 $\pm$ 1.03    | 17.93 $\pm$ 1.14   | 0.43 |
| Cholesterol, mg/dl              | <200            | 196.00 $\pm$ 7.95   | 180.00 $\pm$ 7.98   | 0.16 | 199.20 $\pm$ 11.38  | 179.36 $\pm$ 12.46 | 0.25 |
| C-reactive protein, mg/dl       | <1              | 2.73 $\pm$ 1.26     | 1.41 $\pm$ 30.38    | 0.32 | 1.72 $\pm$ 0.62     | 1.52 $\pm$ 0.47    | 0.79 |
| Gamma-glutamyl transferase, U/L | 5-40            | 20.06 $\pm$ 2.43    | 16.22 $\pm$ 1.11    | 0.16 | 17.85 $\pm$ 2.20    | 16.00 $\pm$ 2.01   | 0.54 |
| HDL Ultra, mg/dl                | >45             | 57.22 $\pm$ 4.13    | 54.94 $\pm$ 3.80    | 0.69 | 61.21 $\pm$ 4.49    | 56.07 $\pm$ 4.56   | 0.43 |
| Immunoglobulin A, mg/dl         | 61-356          | 175.83 $\pm$ 11.08  | 175.56 $\pm$ 11.18  | 0.99 | 169.00 $\pm$ 16.20  | 163.71 $\pm$ 18.92 | 0.83 |
| Immunoglobulin E, mg/dl         | 1.5-144         | 137.96 $\pm$ 32.99  | 129.71 $\pm$ 31.30  | 0.90 | 130.00 $\pm$ 38.76  | 128.95 $\pm$ 37.45 | 0.99 |
| Immunoglobulin G, mg/dl         | 700-1600        | 1066.39 $\pm$ 67.93 | 1105.06 $\pm$ 66.09 | 0.69 | 1021.40 $\pm$ 62.30 | 996.71 $\pm$ 78.25 | 0.81 |
| Immunoglobulin M, mg/dl         | 46-152          | 128.78 $\pm$ 13.89  | 129.78 $\pm$ 16.24  | 0.96 | 111.60 $\pm$ 14.39  | 108.07 $\pm$ 15.53 | 0.87 |
| Free T3, pg/ml                  | 2-4.4           | 2.97 $\pm$ 0.09     | 2.93 $\pm$ 0.06     | 0.70 | 2.86 $\pm$ 0.09     | 2.65 $\pm$ 0.11    | 0.15 |
| Free T4, ng/dl                  | 0.9-2.3         | 0.95 $\pm$ 0.02     | 0.97 $\pm$ 0.01     | 0.46 | 0.93 $\pm$ 0.03     | 0.93 $\pm$ 0.03    | 0.92 |
| Total T3, ng/ml                 | 0.8-2           | 0.98 $\pm$ 0.03     | 0.93 $\pm$ 0.03     | 0.28 | 0.96 $\pm$ 0.04     | 0.87 $\pm$ 0.05    | 0.14 |
| Total T4, ug/dl                 | 5-12            | 6.82 $\pm$ 0.21     | 7.00 $\pm$ 0.22     | 0.55 | 6.66 $\pm$ 0.31     | 6.49 $\pm$ 0.31    | 0.69 |
| TSH, uIU/ml                     | 0.5-5           | 2.77 $\pm$ 0.55     | 2.43 $\pm$ 0.50     | 0.65 | 3.10 $\pm$ 0.92     | 3.15 $\pm$ 0.94    | 0.97 |
| T-Uptake, units                 | 0.7-1.2         | 0.98 $\pm$ 0.03     | 0.97 $\pm$ 0.02     | 0.79 | 0.95 $\pm$ 0.02     | 0.93 $\pm$ 0.03    | 0.44 |
| Vitamin D, ng/ml                | 20-40           | 33.68 $\pm$ 4.60    | 33.52 $\pm$ 4.73    | 0.98 | 38.50 $\pm$ 5.78    | 33.14 $\pm$ 3.92   | 0.45 |
